# Supplementary material for: Autocrine Activation of the Wnt/β-Catenin Pathway by CUX1 and GLIS1 in Breast Cancers
Source: PubMed Central journal article supplement (PMC4197442; doi:10.1242/bio.20148193), 2014-09-12
Supplement: supp_bio.20148193_bio.20148193-s1.pdf [file supp_bio.20148193_bio.20148193-s1.pdf]

**Supplementary Material**  
**Charles Vadnais et al. doi: 10.1242/bio.20148193**

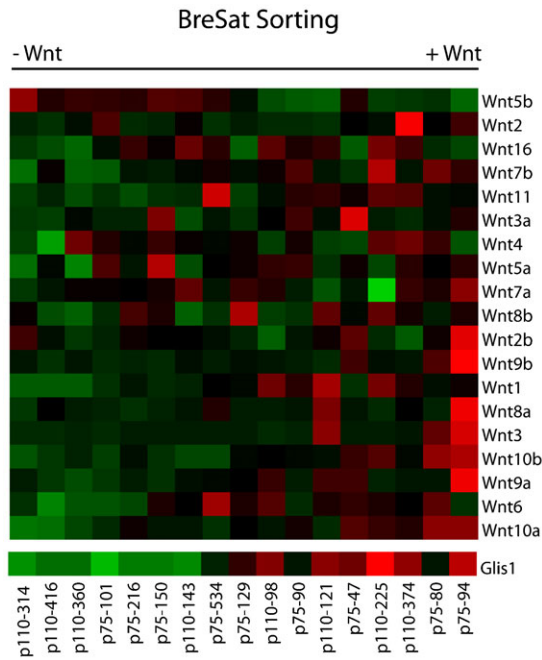

**Fig. S1. BreSAT sorting of MMTV-CUX1 Mammary Tumors.** Heatmap representation of mammary tumors ranked according to Wnt expression using the BreSAT algorithm.

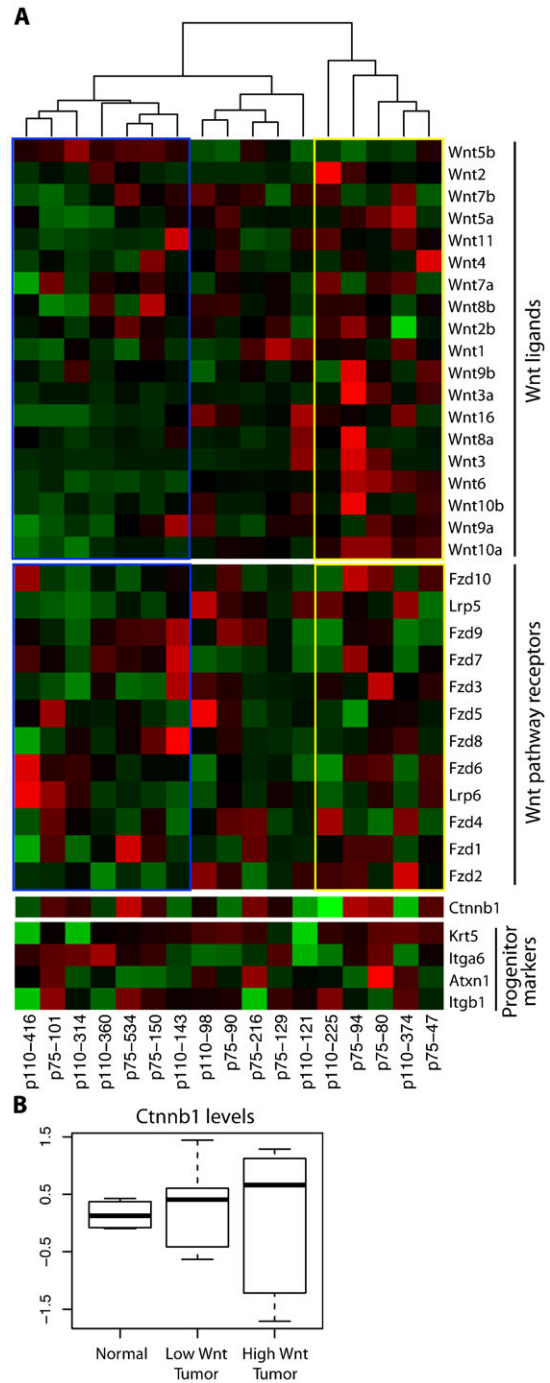

**Fig. S2. Activation of the Wnt/ $\beta$ -Catenin Pathway in MMTV-CUX1 Mammary Tumors is independent of Frzd receptor and  $\beta$ -Catenin transcript levels.** (A) Heatmap of mammary tumors clustered according to Wnt expression, with corresponding expression of Frzd receptor genes,  $\beta$ -Catenin and markers of progenitor cells. (B) Boxplot representation of  $\beta$ -Catenin expression in normal mammary epithelial cells, “non-Wnt” tumors and “Wnt” tumors.

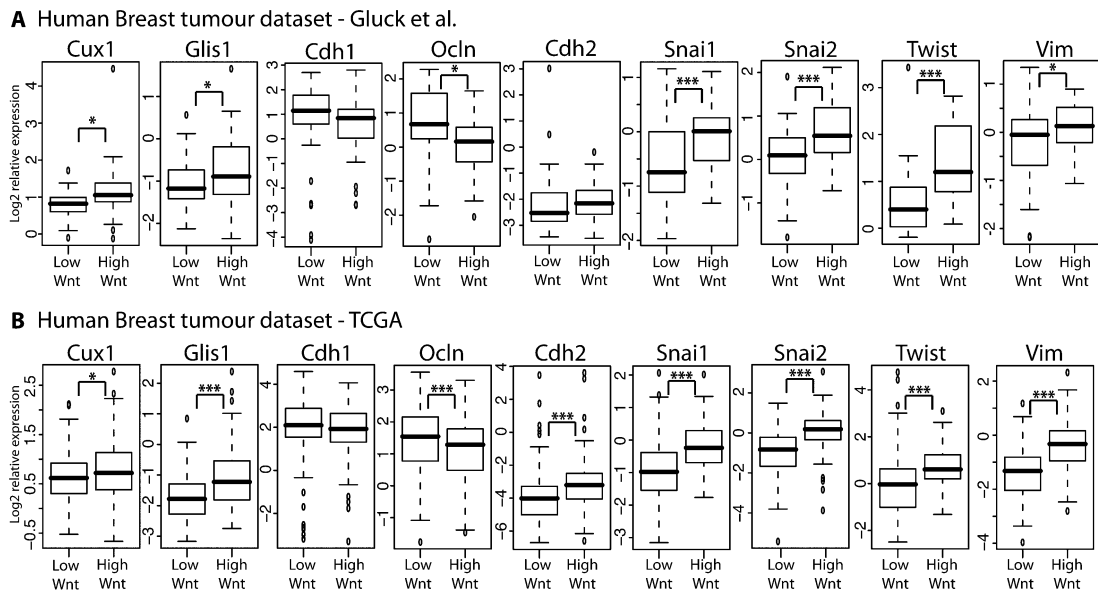

**Fig. S3. Expression of CUX1, Glis1 and EMT Markers in Human Breast Cancer Datasets.** (A) Expression of indicated genes in the top 25% (High Wnt) and bottom 25% (Low Wnt) samples sorted according to Wnt genes expression from the Gluck et al. human breast cancer dataset from Oncomine (Glück et al., 2012). \* indicates  $p < 0.05$ , \*\*  $< 0.01$ , \*\*\*  $< 0.001$  on a Welch-corrected student's T test. (B) Analysis as in A for the TCGA Dataset (Cancer Genome Atlas Network, 2012).

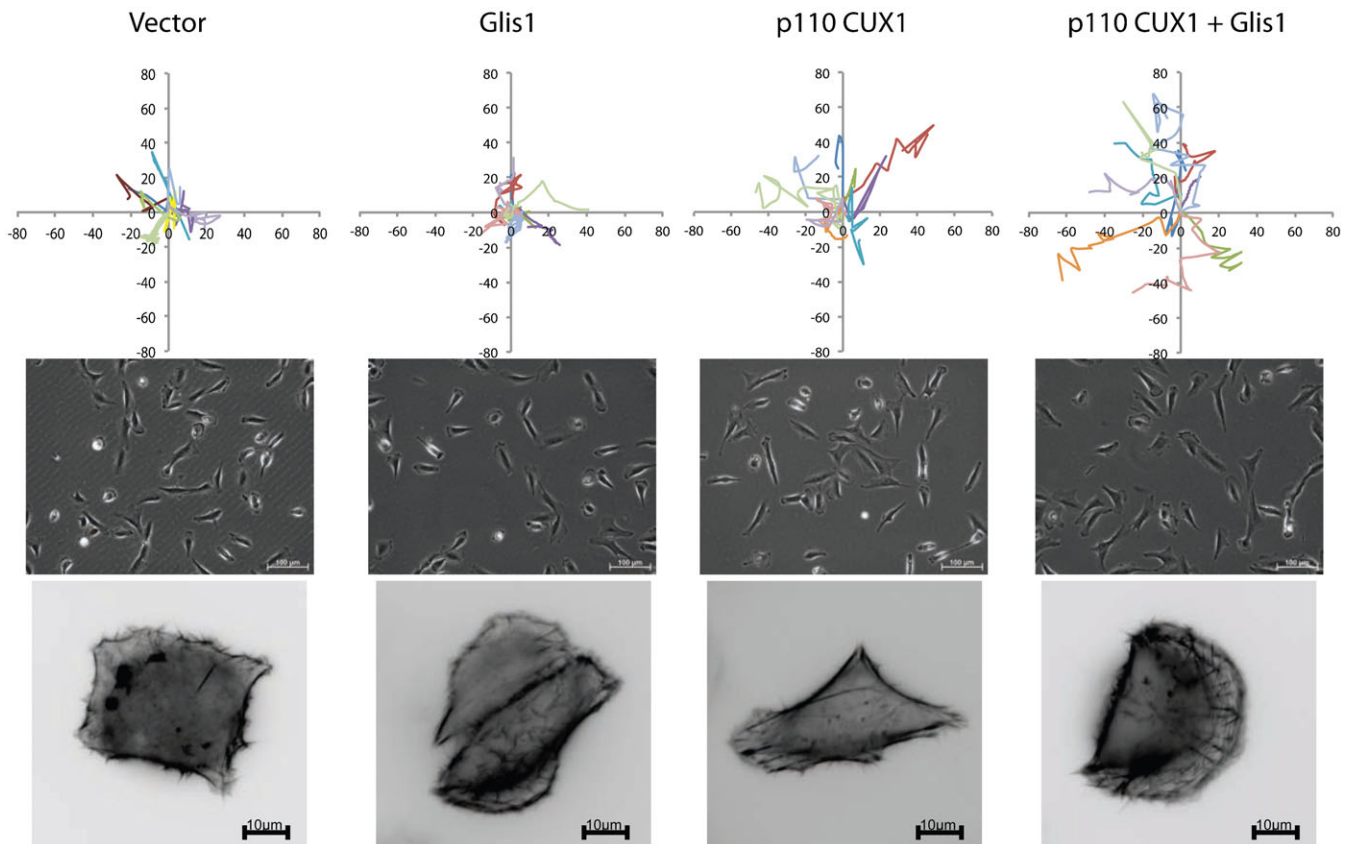

**Fig. S4. Tracking Plot of Cell Migration and Sample Images.** MCF10A cells over expressing Glis1, p110 CUX1 or both were imaged by time-lapse video microscopy (Fig. 7). Ten representative cells from each cell line were randomly selected and their migratory track relative to the origin is depicted using the X and Y coordinates ( $\mu\text{m}$ ). Representative phase contrast images of the cells are also shown for each cell line. MCF10A cells expressing vector, Glis or p110 CUX1 alone had an elongated morphology with very little to no ruffles and no defined leading edge. Whereas in the presence of Glis and p110 CUX1, cells form large lamellapodial ruffles at the leading edge. Scale bars: 100  $\mu\text{m}$  (middle), 10  $\mu\text{m}$  (bottom).

**Table S1. Correlation between Wnt, CUX1 and GLI gene expression in human tumor datasets**

| Gene  | Breast cancer datasets |
|-------|------------------------|
| CUX1  | 3 of 3 (100%)          |
| Glis1 | 7 of 8 (88%)           |

The table shows the number of human breast cancer datasets retrieved from Oncomine in which the top 25% of samples ranked according to Wnt gene expression display significantly higher expression of *CUX1* or *GLIS1* than the bottom 25% of samples, as tested by a Welch corrected T Test with  $P < 0.05$ .
